# Supplementary material for: Construction and validation of a clinicopathologic signature for predicting the prognosis of stage II and III colorectal cancer
Source: Research Square preprint supplement (doi:10.21203/rs.3.rs-497202/v1), 2021-05-14
Supplement: Supplementary file 1 [file 029f48e7f557d643df8284c7.docx]

Supplementary figure 1. The VIMP values of all the variables included in our signature.


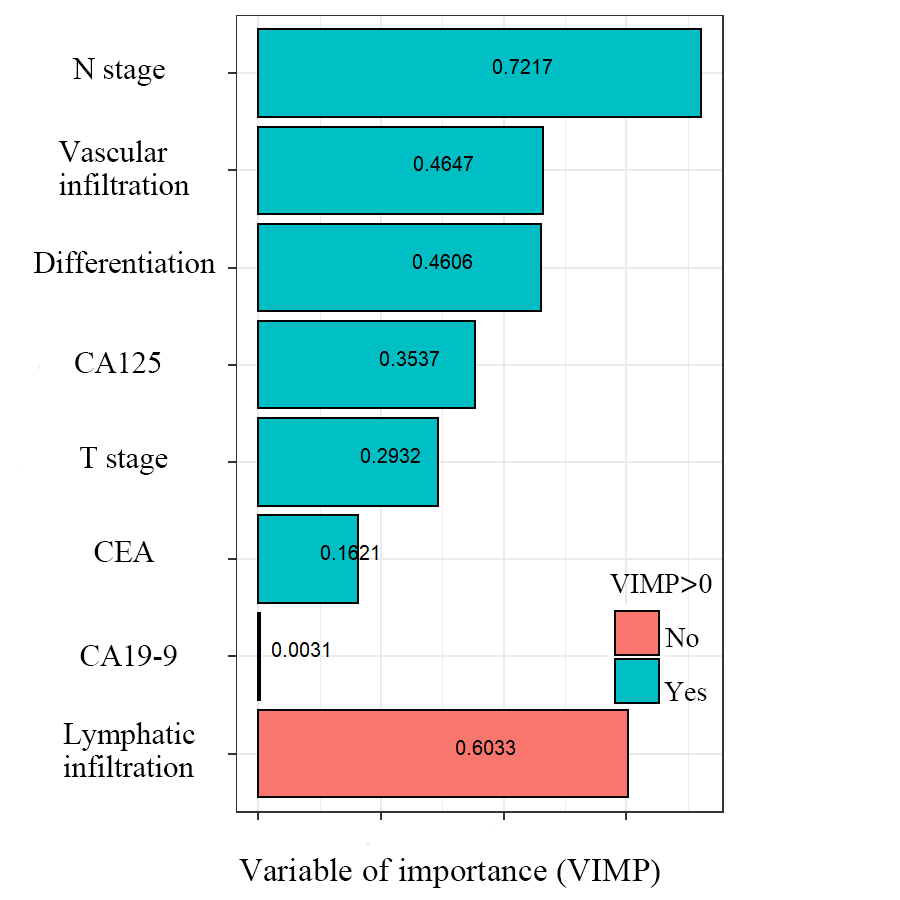


Supplementary figure 2. K-M curves for differences in patient survival in high-, intermediate-, and low-risk groups from external cohort validation.


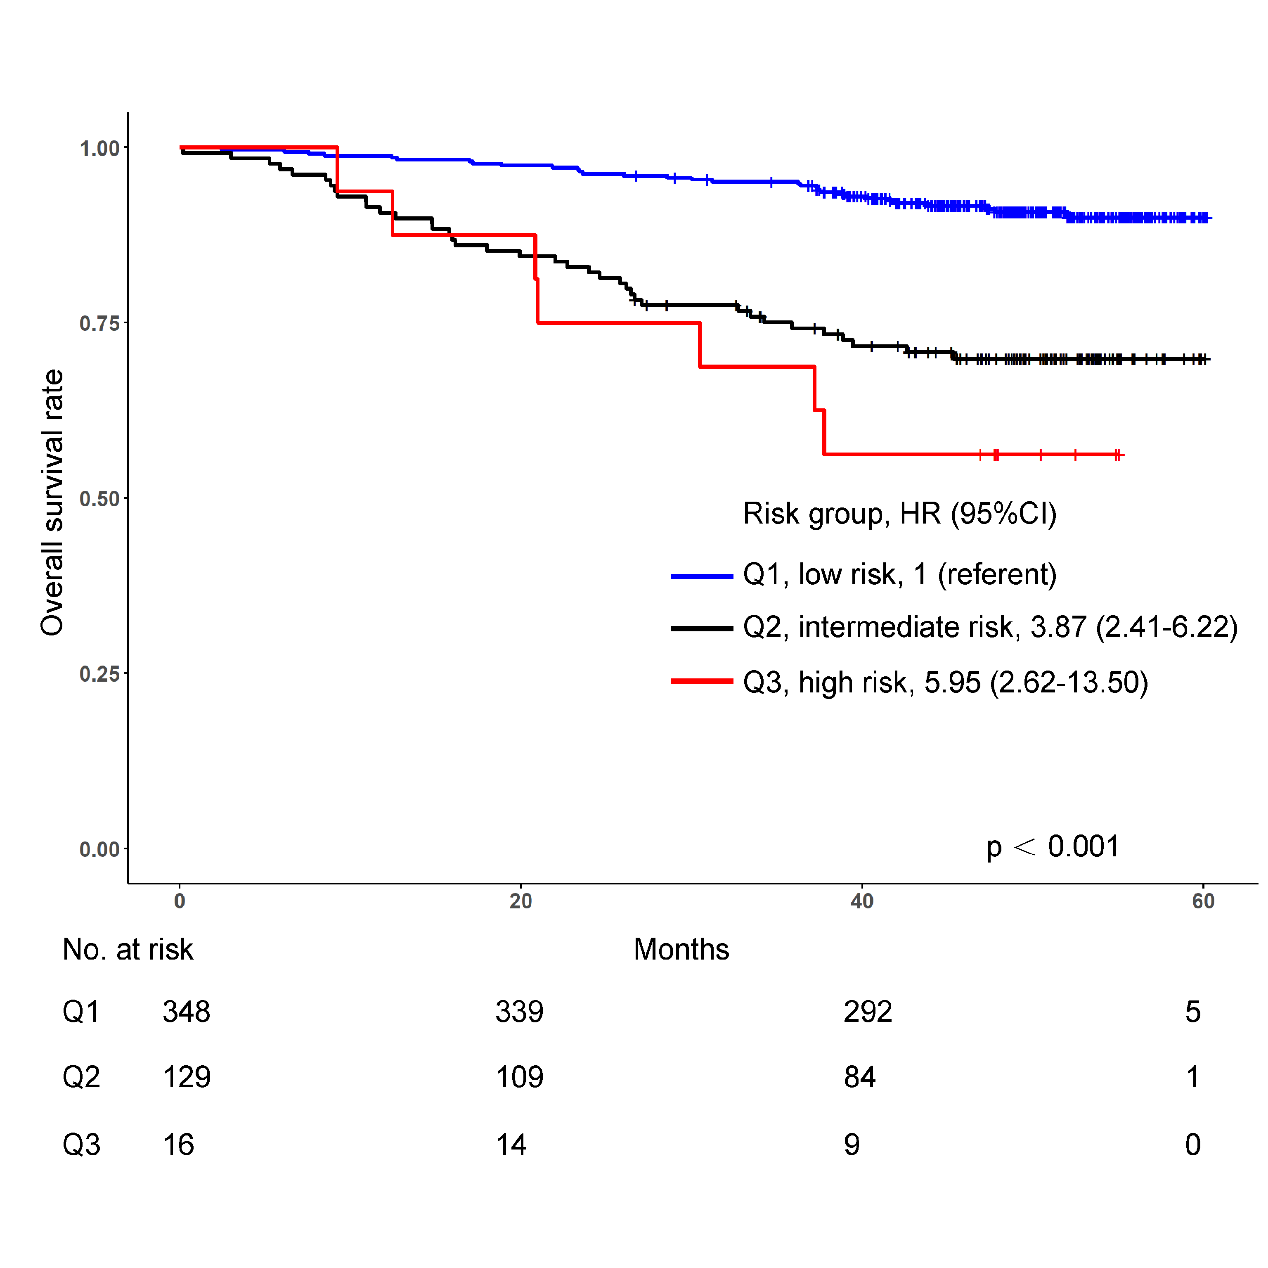


Supplementary table 1 Simulate Anneal Arithmetic to select variables to construct the signature for OS

| **Variables** | **Coef** | **S.E.** | **Wald** | **Pr (> |Z|)** |
| --- | --- | --- | --- | --- |
| T stage | 0.2932 | 0.1508 | 1.94 | 0.0518 |
| N stage | 0.7217 | 0.1065 | 6.78 | < 0.0001 |
| Differentiation | 0.4606 | 0.1431 | 3.22 | 0.0013 |
| Lymphatic infiltration | -0.6033 | 0.1976 | -3.05 | 0.0023 |
| Vascular infiltration | 0.4647 | 0.1839 | 2.53 | 0.0115 |
| CEA | 0.1621 | 0.0542 | 2.99 | 0.0028 |
| CA125 | 0.3537 | 0.0833 | 4.25 | < 0.0001 |
| CA19-9 | 0.0031 | 0.0012 | 2.51 | 0.0119 |
| C-index | 0.7212 | | | |

Supplementary table 2 Univariate Cox regression analyses to validate our signature (external validation cohort)

| **Variables** | **CRC OS, p-value** |
| --- | --- |
| T stage | 0.0001 |
| N stage | 0.0001 |
| Differentiation | 0.0001 |
| Lymphatic infiltration | 0.0001 |
| Vascular infiltration | 0.0042 |
| CEA | 0.0001 |
| CA19-9 | 0.0008 |
| CA125 | 0.0336 |
